# Supplementary material for: Assessment of Potential Anti-Methanogenic and Antimicrobial Activity of Ethyl Nitroacetate, α-Lipoic Acid, Taurine and L-Cysteinesulfinic Acid In Vitro
Source: MDPI journal article supplement (doi:10.3390/microorganisms12010034), 2023-12-23
Supplement: s1 [file s1]

**Supplemental Table S1.** Effects of ethyl nitroacetate,  $\alpha$ -lipoic acid or their combination on rumen mol% volatile fatty acid concentrations.

| Measured variable                        | None               | Ethyl nitroacetate  |                     | $\alpha$ -Lipoic acid |                    | Both at            |                     | <i>P</i> | SEM   |
|------------------------------------------|--------------------|---------------------|---------------------|-----------------------|--------------------|--------------------|---------------------|----------|-------|
|                                          |                    | 3 mM                | 9 mM                | 3 mM                  | 9 mM               | 3 mM               | 9 mM                |          |       |
| Total acids ( $\mu$ mol/mL) <sup>1</sup> | 51.29              | 56.10               | 49.52               | 30.34                 | 45.70              | 30.40              | 41.82               | 0.0664   | 6.680 |
| Mol%                                     |                    |                     |                     |                       |                    |                    |                     |          |       |
| Acetate                                  | 64.69 <sup>a</sup> | 58.87 <sup>ab</sup> | 54.93 <sup>bc</sup> | 61.47 <sup>ab</sup>   | 64.46 <sup>a</sup> | 52.08 <sup>c</sup> | 56.08 <sup>bc</sup> | 0.0004   | 1.539 |
| Propionate                               | 23.12 <sup>b</sup> | 26.57 <sup>ab</sup> | 32.33 <sup>a</sup>  | 26.09 <sup>ab</sup>   | 22.46 <sup>b</sup> | 31.79 <sup>a</sup> | 29.82 <sup>ab</sup> | 0.0020   | 1.45  |
| Butyrate                                 | 9.12 <sup>b</sup>  | 11.05 <sup>ab</sup> | 9.98 <sup>b</sup>   | 9.16 <sup>b</sup>     | 9.47 <sup>b</sup>  | 12.10 <sup>a</sup> | 10.95 <sup>ab</sup> | 0.0040   | 0.488 |
| Valerate                                 | 1.85 <sup>b</sup>  | 2.10 <sup>ab</sup>  | 1.53 <sup>b</sup>   | 2.31 <sup>ab</sup>    | 2.12 <sup>ab</sup> | 2.63 <sup>a</sup>  | 1.37 <sup>b</sup>   | 0.0095   | 0.231 |
| Isobutyrate                              | 0.52               | 0.60                | 0.51                | 0.38                  | 0.60               | 0.46               | 0.67                | 0.0675   | 0.060 |
| Isovalerate                              | 0.69 <sup>b</sup>  | 0.82 <sup>ab</sup>  | 0.71 <sup>b</sup>   | 0.59 <sup>b</sup>     | 0.88 <sup>ab</sup> | 0.74 <sup>b</sup>  | 1.12 <sup>a</sup>   | 0.0167   | 0.081 |

<sup>1</sup>Per mL of incubation incubation fluid.

<sup>a,b,c,d</sup>Means within rows with unlike superscripts differ ( $P < 0.05$ ) using an LSMeans Differences with a Tukey's Honestly Significant Difference calculation.
